# Supplementary material
Source: publisher figshare collection journal article supplement (https://rs.figshare.com/ndownloader/files/24350412)
Supplement: Supplementary file 1 [file 24350412]

## Sheet: Sheet1
SI Table 1. Sample information and whole genome analysis for comparative data and samples used in this study
Sample	Geographic origin	Date isolated or radiocarbon dating	SRA or ENA accession number(s)	Age	Total Read Pairs	Analysis-ready reads (trimmed for modern, merged for ancient)	Proportion of read pairs kept after trimming or trimming and merging	Mapped reads	Q37 mapped reads	Unique Q37 mapped reads	Average length of mapped reads	Mean coverage	Std dev of mean coverage	% reference covered >= 1X	% reference covered >= 5X	Cluster factor (Mapped reads/ Unique Q37 mapped reads)	Endogenous DNA (%) (Mapped reads/Analysis-ready reads)
3077	Sweden	1055-1093 CE	SRR847038 SRR847039	Ancient	7278465	6151433	0.8451	1008683	826568	425103	66.4316	8.6411X	4.4055X	0.973	0.842	2.3727	16.3975
Body188	Czech Republic	800-900 CE	SRR6263249 SRR6263255	Ancient	73543455	66913034	0.9098	22050183	17014841	6376543	87.8473	171.6797X	47.7915X	0.9828	0.9808	3.458	32.9535
GC96	UK	415-545 CE	SRR6263252 SRR6263253 SRR6263254	Ancient	91619629	59510698	0.6495	3266555	2017809	481560	93.8043	13.8222X	7.7245X	0.9796	0.9294	6.7832	5.48902
Jorgen-404	Denmark	1219-1279 CE	ERR1883841 ERR1883842 ERR1883830 ERR1883819	Ancient	207858575	179030468	0.8613	394870	373635	327499	91.5604	9.175X	3.826X	0.9768	0.9286	1.2057	0.22056
Jorgen-427	Denmark	1164-1258 CE	ERR1883845 ERR1883844 ERR1883843 ERR1883831 ERR1883820	Ancient	221212451	185305959	0.8376	4405258	4172368	1262971	104.398	40.343X	28.0711X	0.9787	0.975	3.488	2.37729
Jorgen-507	Denmark	1058-1253 CE	ERR1883823 ERR1883833 ERR1883849 ERR1883850	Ancient	268152746	234947390	0.8761	24882921	24102756	5704073	123.021	214.7093X	35.5467X	0.9808	0.9797	4.3623	10.5908
Jorgen-533	Denmark	1044-1214 CE	ERR1884223 ERR1883859	Ancient	34135748	24659704	0.7224	405070	391256	352985	99.7077	10.7689X	3.9168X	0.9782	0.9561	1.1475	1.64264
Jorgen-625	Denmark	1345-1391 CE	SRR847050 SRR847051 SRR847052	Ancient	24988422	23648447	0.9463	7025919	5837540	3108077	140.639	133.7452X	29.1962X	0.9859	0.9822	2.2605	29.7099
Jorgen-722	Denmark	1256-1377 CE	ERR1884226 ERR1884152 ERR1883888 ERR1883887 ERR1883861 ERR1884226 ERR1884152 ERR1883888 ERR1883887 ERR1883861	Ancient	405899372	359523462	0.8857	1043627	992270	654868	92.7374	18.5822X	5.7941X	0.9791	0.9742	1.5936	0.290281
Jorgen-749	Denmark	1223-1279 CE	ERR1884228 ERR1883862	Ancient	30554348	24569542	0.8041	1919062	1856664	1328685	100.233	40.749X	9.64X	0.9797	0.9765	1.4443	7.81074
Refshale-16	Denmark	1079-1127 CE	SRR847702 SRR847056 SRR847057 SRR847058	Ancient	82851634	61406927	0.7411	9055809	7986323	4007975	97.2871	119.307X	26.876X	0.9787	0.9774	2.2594	14.7472
SK11	Hungary	600-700 CE	SRR6263250 SRR6263256	Ancient	1802918	1616216	0.8964	695892	521064	433638	57.9009	7.6967X	4.8538X	0.9603	0.7312	1.6048	43.0569
SK14	UK	995-1033 CE	SRR847036 SRR847064 SRR6233936	Ancient	41760655	33004682	0.7903	23434226	14217369	1657707	92.9646	47.1538X	21.8545X	0.9834	0.9796	14.1365	71.0027
SK2	UK	1260-1306 CE	SRR847034	Ancient	54243849	50912126	0.9385	47738941	39625705	521849	65.4105	10.4442X	4.1714X	0.9738	0.9338	91.4803	93.7673
SK8	UK	909-1069 CE	SRR847069 SRR847070	Ancient	10141590	8727239	0.8605	912321	788456	630118	90.7531	17.4974X	6.7317X	0.9773	0.9712	1.4478	10.4537
T18	Italy	650-700 CE	SRR6263251 SRR6263257	Ancient	1723103	1566401	0.9091	487979	361909	306535	68.3792	6.4599X	4.372X	0.9556	0.6517	1.5919	31.1529
2936	Malawi	2000	SRR6241802	Modern	17844847	17039285	0.9548	1651151	1575101	1212476	36.3232	13.48X	4.86X	0.9704	0.9599	1.3618	9.24394
85054	Martinique	1990	SRR6241803	Modern	78834921	78692332	0.9981	564296	545999	386426	99.8428	11.81X	5.7X	0.971	0.8984	1.4602	0.69384
97016	French West Indies	2000	SRR6241804	Modern	177846203	177578928	0.9984	851257	827282	763180	99.4011	23.21X	6.98X	0.9751	0.9733	1.1154	0.465867
1126-2007	Brazil	2016	SRR3823995	Modern	33857258	6422460	0.1896	942127	827445	414726	56.1006	7.12X	4.07X	0.9595	0.7227	2.2716	12.8836
1126-2011	Brazil	2016	SRR3823996	Modern	3521261	3428465	0.9736	821541	783620	471931	91.1761	13.17X	6.35X	0.9717	0.9182	1.7408	22.8563
1262-16	Pakistan	2016	SRR6241805	Modern	7052472	6255633	0.887	5869886	5695295	3694862	99.9704	113.02X	20.93X	0.9756	0.9754	1.5886	91.0427
2188-2007	Brazil	2016	SRR3823997	Modern	39531762	16928406	0.4282	7167105	6394307	2903497	67.9754	60.39X	23.92X	0.9753	0.9726	2.4684	37.7726
2188-2014	Brazil	2016	SRR3823998	Modern	17698637	17408156	0.9835	2894686	2629135	1905918	100.312	58.5X	18.68X	0.9757	0.9754	1.5187	15.1029
2DDS	Brazil	2015	SRR6241798	Modern	37751444	67662960	0.8951	17059438	15769745	7099719	97.8824	186.16X	72.59X	0.9752	0.9733	2.4028	23.3063
3208-2007	Brazil	2016	SRR3823999	Modern	26328721	8016151	0.3044	1562194	1374979	966541	67.1489	19.86X	10.93X	0.9711	0.9248	1.6162	17.1526
3208-2015	Brazil	2016	SRR3824000	Modern	16528834	10652701	0.6444	5133479	4575234	2411903	71.785	52.97X	23.44X	0.9751	0.9696	2.1283	42.9491
Airaku-2	Japan	2000	SRR6241799	Modern	1686128	3361968	0.9632	3025252	2706032	2696629	203.743	79.61X	26.96X	0.9843	0.9823	1.1218	80.4895
Airaku-3	Japan	2000	SRR1132821	Modern	87108385	146089776	0.5794	48237282	35384531	24233507	97.922	703.64X	239.56X	0.976	0.9757	1.9905	24.2211
Amami	Japan	2000	SRR6241800	Modern	1642868	3271975	0.9831	2651832	2506358	2496150	185.991	51.04X	18.17X	0.9836	0.9802	1.0623	76.6008
ARLP-07	Ethiopia	2015	SRR6241801	Modern	2721920	2690881	0.9885	2203482	2140330	1582859	99.7989	48.33X	10.35X	0.9756	0.975	1.392	79.5401
ARLP-10	Ethiopia	2015	SRR6241797	Modern	5658451	5628616	0.9947	5556582	5395504	3454350	99.7234	105.4X	19.54X	0.9756	0.9753	1.6085	95.8584
ARLP-11	Ethiopia	2015	SRR6241818	Modern	10680740	10402390	0.9739	9915667	9621696	3898784	100.126	119.45X	22.45X	0.9756	0.9753	2.5432	92.4951
ARLP-12	Ethiopia	2015	SRR6241819	Modern	7163520	7107867	0.9922	6712714	6523342	3864321	100.221	118.5X	22.63X	0.9757	0.9754	1.7371	91.7764
ARLP-13	Ethiopia	2015	SRR6241820	Modern	7811586	7739841	0.9908	7385146	7176493	4152595	100.287	127.43X	25.28X	0.9756	0.9754	1.7784	92.7215
ARLP-14	Ethiopia	2015	SRR6241821	Modern	5271365	4456581	0.8454	2752433	2666856	1057791	100.054	32.38X	8.15X	0.9755	0.9746	2.602	59.8409
ARLP-20	Ethiopia	2015	SRR6241822	Modern	7358676	7216877	0.9807	1475279	1433131	1196942	100.098	36.66X	8.79X	0.9754	0.9747	1.2325	19.858
ARLP-23	Ethiopia	2015	SRR6241823	Modern	8135120	8100955	0.9958	7767001	7545941	4149232	100.239	127.26X	23.97X	0.9757	0.9754	1.8719	93.1488
ARLP-25	Ethiopia	2015	SRR6241824	Modern	9137495	8821171	0.9653	8265975	8032989	4125904	100.27	126.59X	23.31X	0.9756	0.9753	2.0034	91.0649
ARLP-27	Ethiopia	2015	SRR6241825	Modern	11991288	11865365	0.9894	11100039	10787535	4899642	100.341	150.43X	26.9X	0.9756	0.9754	2.2654	90.9162
ARLP-29	Ethiopia	2015	SRR6241816	Modern	7706474	7403692	0.9607	6822848	6624487	3856319	100.272	118.32X	22.09X	0.9757	0.9754	1.7692	89.4755
ARLP-30	Ethiopia	2015	SRR6241817	Modern	10545484	10491075	0.9948	10406576	10112992	4749930	100.317	145.8X	26.56X	0.9756	0.9754	2.1908	96.3961
ARLP-32	Ethiopia	2015	SRR6241712	Modern	4061454	3888828	0.9574	2591975	2512907	1791601	100.018	54.83X	12.14X	0.9756	0.975	1.4467	64.6186
ARLP-37	Ethiopia	2015	SRR6241711	Modern	11728767	11563242	0.9858	11417615	11092062	4920796	100.301	151.02X	27.1X	0.9756	0.9755	2.3202	95.9252
ARLP-40	Ethiopia	2015	SRR6241714	Modern	2635501	2481651	0.9416	2103293	2044145	1539205	99.9679	47.08X	10.94X	0.9755	0.9749	1.3664	82.3704
ARLP-46	Ethiopia	2015	SRR6241713	Modern	8050472	7913503	0.9829	1592956	1548030	1259175	100.094	38.56X	9.06X	0.9755	0.9748	1.265	19.5619
ARLP-49	Ethiopia	2015	SRR6241707	Modern	7327183	7076205	0.9657	6549897	6360680	3534051	99.8172	107.94X	21.5X	0.9756	0.9753	1.8533	89.8883
ARLP-52	Ethiopia	2015	SRR6241710	Modern	4924875	4854677	0.9857	3398653	3303141	2423300	100.162	74.27X	15.35X	0.9756	0.9752	1.4024	68.0404
ARLP-57	Ethiopia	2015	SRR6241709	Modern	3570498	3529184	0.9884	3469029	3368175	2514038	99.5676	76.59X	17.02X	0.9756	0.9752	1.3798	95.4378
ARLP-62	Ethiopia	2015	SRR6241716	Modern	5563317	5488332	0.9865	4090578	3974241	2674950	100.17	81.99X	16.8X	0.9756	0.9753	1.5292	72.4125
ARLP-68	Ethiopia	2015	SRR6241724	Modern	10042650	9902762	0.986	5627277	5465892	3466627	100.382	106.48X	20.13X	0.9756	0.9754	1.6232	55.1956
ARLP-73	Ethiopia	2015	SRR6241721	Modern	8723589	8563635	0.9816	619470	601581	389501	100.257	11.95X	4.03X	0.975	0.9659	1.5904	7.02483
ARLP-74	Ethiopia	2015	SRR6241722	Modern	8780959	8508679	0.9689	1283612	1247369	820075	100.413	25.2X	6.46X	0.9754	0.9743	1.5652	14.66
Bn7-39	Benin	2015	SRR6241719	Modern	5837999	5360010	0.9181	3353936	3231968	2481527	100.291	76.15X	15.31X	0.9756	0.9753	1.3515	60.2978
Bn7-41	Benin	2015	SRR6241720	Modern	8283302	7362440	0.8888	2815366	2730058	1994380	100.287	61.2X	13.04X	0.9756	0.9751	1.4116	37.0809
Bn8-46	Benin	2015	SRR6241717	Modern	9981520	9271916	0.9289	7038424	6842538	3606151	100.265	110.63X	20.9X	0.9756	0.9753	1.9517	73.7985
Bn8-51	Benin	2015	SRR6241725	Modern	8239347	7982870	0.9688	737388	714569	287969	100.116	8.82X	3.46X	0.9746	0.9113	2.5606	8.95128
Bn8-52	Benin	2015	SRR6241726	Modern	9008415	8833151	0.9805	5498138	5323275	3430901	100.157	105.14X	19.75X	0.9756	0.9753	1.6025	60.2647
BP	Brazil	2013	SRR6241730	Modern	39195182	37592326	0.9591	5576094	4567877	2540630	91.1168	70.83X	29.58X	0.9756	0.9731	2.1947	12.1511
Br1	Brazil	2013	SRR6241732	Modern	17217951	17102206	0.9932	1568502	1500005	1203010	94.939	34.95X	16.72X	0.9745	0.9645	1.3038	8.77083
Br14-1	Brazil	2014	SRR6241729	Modern	2322600	3815130	0.9711	2786718	2517595	2510733	212.924	101.57X	36.41X	0.9843	0.9819	1.1099	65.9898
Br14-2	Brazil	2014	SRR6241728	Modern	1562647	2733536	0.8619	1063018	920741	919029	238.885	58.44X	21.41X	0.9839	0.9807	1.1566	33.6831
Br14-3	Brazil	2014	SRR6241727	Modern	1505671	2745815	0.8206	1012722	846583	844949	247.211	60.67X	20.6X	0.9841	0.9813	1.1985	30.8318
Br14-4	Brazil	2014	SRR6241734	Modern	2019777	2733536	0.8084	2734944	2302287	2296093	241.792	152.23X	50.54X	0.9847	0.9833	1.1911	84.2238
Br14-5	Brazil	2014	SRR6241733	Modern	1913732	3545788	0.8499	1643430	1421159	1417971	232.416	82.63X	29.08X	0.9844	0.982	1.159	40.0802
Br2016-14	Brazil	2016	SRR6241731	Modern	85863051	83595061	0.9735	36348082	34440325	2664040	100.064	81.57X	16.44X	0.9756	0.9753	13.6439	41.199
Br2016-15	Brazil	2016	SRR6241736	Modern	18047035	17987641	0.9967	7501140	7287239	3715113	100.327	114.05X	21.06X	0.9756	0.9753	2.019	40.5125
Br2016-16	Brazil	2016	SRR6241735	Modern	11577181	11479811	0.9915	1582128	1537997	417451	100.159	12.79X	4.61X	0.9751	0.9643	3.7899	13.3974
Br2016-17	Brazil	2016	SRR6241745	Modern	6912954	6670911	0.9649	6433193	6238892	3898711	100.177	119.5X	21.88X	0.9756	0.9754	1.65	93.5238
Br2016-18	Brazil	2016	SRR6241746	Modern	19666667	18734350	0.9525	11952289	11597569	5179141	100.342	159.01X	27.69X	0.9756	0.9754	2.3077	61.9054
Br2016-19	Brazil	2016	SRR6241747	Modern	18213964	17376677	0.954	16185232	15685014	5663216	100.43	174.03X	29.69X	0.9757	0.9755	2.8579	90.2647
Br2016-20	Brazil	2016	SRR6241748	Modern	15152915	14244804	0.94	13657961	13239042	5464276	100.387	167.84X	28.88X	0.9757	0.9755	2.4995	92.9394
Br2016-21	Brazil	2016	SRR6241741	Modern	17666573	16919800	0.9577	16652080	16165724	5617869	100.363	172.52X	29.44X	0.9757	0.9755	2.9641	95.5432
Br2016-24	Brazil	2016	SRR6241742	Modern	21855915	20444075	0.9354	353650	342773	316108	99.9408	9.67X	3.6X	0.9749	0.9395	1.1187	1.67664
Br2016-26	Brazil	2016	SRR6241743	Modern	6498925	6001685	0.9234	5670570	5498520	3611887	100.12	110.65X	20.26X	0.9756	0.9753	1.5699	91.6163
Br2016-27	Brazil	2016	SRR6241744	Modern	12478479	11125898	0.8916	10923801	10564326	5024284	93.2336	143.33X	25.82X	0.9756	0.9753	2.1742	94.9526
Br2016-45	Brazil	2016	SRR6241739	Modern	9127067	8684051	0.9514	6368007	6174148	3571306	100.442	109.76X	20.88X	0.9757	0.9754	1.7831	71.0976
Br2016-46	Brazil	2016	SRR6241740	Modern	7944154	6674510	0.8401	894597	868535	680358	100.444	20.91X	5.71X	0.9754	0.9738	1.3148	13.0127
Br2016-47	Brazil	2016	SRR6241759	Modern	7206102	6822839	0.9468	6650764	6447015	3951602	100.426	121.43X	21.9X	0.9756	0.9754	1.683	94.4917
BrMM1	Brazil	2013	SRR6241749	Modern	10009351	9773129	0.9763	3031613	2927292	1475600	98.5469	44.49X	19.38X	0.9753	0.9711	2.0544	29.9525
BrMM2	Brazil	2013	SRR6241761	Modern	10513139	10194125	0.9696	3936445	3801538	2036235	99.2248	61.82X	25.16X	0.9754	0.9728	1.9331	37.2915
BrMM4	Brazil	2013	SRR6241760	Modern	21682852	20659122	0.9527	13862394	13371158	4442211	99.6006	135.38X	37.03X	0.9757	0.9753	3.1206	64.7228
BrMM5	Brazil	2013	SRR6241763	Modern	12353225	11800685	0.9552	4270129	4094105	2390252	99.1199	72.49X	27.08X	0.9756	0.9742	1.7864	34.6938
Brw15-1	UK	2015	SRR3672737	Modern	5911668	5891023	0.9965	5609307	5450599	3538404	100.111	108.39X	20.41X	0.9756	0.9754	1.5852	92.5238
Brw15-10	UK	2015	SRR3672752	Modern	5108689	5027197	0.984	4876782	4731944	3244213	99.6855	98.95X	18.99X	0.9756	0.9753	1.5032	94.1269
Brw15-12	UK	2015	SRR3672753	Modern	3866880	3599820	0.9309	655685	636060	592444	99.6408	18.06X	5.34X	0.9753	0.9737	1.1067	17.6692
Brw15-20	UK	2015	SRR3672757	Modern	3004818	2978979	0.9914	2595707	2519167	2031347	99.7058	61.97X	12.6X	0.9756	0.9751	1.2778	84.5648
Brw15-25	UK	2015	SRR3672758	Modern	3818804	3800241	0.9951	3779272	3671659	2681856	99.6015	81.73X	16.6X	0.9756	0.9753	1.4092	96.6165
Brw15-5	UK	2015	SRR3672738	Modern	6413341	6366983	0.9927	1154498	1122287	976578	100.073	29.9X	7.64X	0.9754	0.9745	1.1821	17.6267
Ch4	Sierra Leone	2009	SRR5832643	Modern	55710090	110566956	0.9656	89419768	79864780	15940457	81.5938	200.97X	73.98X	0.9757	0.9753	5.6096	72.2321
CM1	Philippines	1994	SRR5832641 SRR5832642	Modern	49948870	46499291	0.9309	13525259	12113126	538921	81.0838	13.37X	5.5652X	0.9774	0.9538	25.0969	26.0501
EGG	Mexico	2016	SRR6241762	Modern	11416771	10644561	0.9323	3528105	3421887	2444513	100.253	74.99X	14.6X	0.9756	0.9752	1.4432	32.1468
Fio3	Brazil	2012	SRR6241765	Modern	151981065	300845787	0.6668	27501448	23901079	553067	90.1223	14.25X	7.82X	0.9731	0.9227	49.7253	7.94463
Gu4-17	Guinea	2014	SRR6241764	Modern	4536244	9072034	0.99	384566	273822	269823	247.709	15.12X	10.8X	0.9757	0.885	1.4252	3.01831
Gu4-19L	Guinea	2014	SRR6241738	Modern	5610575	11220390	0.9847	949322	630917	585081	246.359	31.39X	24.74X	0.9848	0.9672	1.6225	5.62295
Gu5-23	Guinea	2014	SRR6241750	Modern	11655407	11571488	0.9927	6047709	5876612	2490476	100.114	76.29X	15.61X	0.9756	0.9752	2.4283	50.7853
I30-W09	USA	2005	SRR062544	Modern	6427117	6170200	0.96	1929388	1821366	1553841	33.6309	15.99X	5.18X	0.9705	0.9683	1.2416	29.5188
Indonesia-1	Indonesia	2000	SRR6241780	Modern	1465912	2912602	0.9837	2526416	2335358	2325045	185.237	48.9X	16.93X	0.9838	0.9804	1.0866	80.1812
Izumi	Japan	2000	SRR6241781	Modern	1739089	3438198	0.99	2562430	2438960	2430392	174.667	35.74X	14.75X	0.9827	0.9761	1.0543	70.9372
Kanazawa	Japan	2000	SRR6241778	Modern	7698934	15182730	0.9823	7277784	6825789	6692264	184.488	113.85X	49.87X	0.9843	0.9821	1.0874	44.9576
Kitasato	Japan	2000	SRR6241779	Modern	3037213	6042364	0.994722	1648014	1547136	1312479	185.679	49.91X	49.19X	0.9655	0.9063	1.2556	25.6048
Korea-3-2	Korea	2000	SRR6241784	Modern	1488293	2933834	0.9823	2463784	2338798	2329827	184.285	41.96X	15.32X	0.9833	0.979	1.0574	79.7181
Kusatsu-6	Japan	2000	SRR6241785	Modern	1812481	3606182	0.994819	497556	467913	366117	167.24	13.15X	11.62X	0.9281	0.7553	1.359	12.9753
Kyoto-1	Japan	2000	SRR6241782	Modern	2479509	4917446	0.9706	1185016	1061544	1050885	208.097	32.16X	13.84X	0.9826	0.9726	1.1276	21.5873
Ml10-91	Mali	2016	SRR6241783	Modern	6859294	6647799	0.9691	6535349	6346394	3907029	100.464	120.1X	21.61X	0.9756	0.9754	1.6727	95.4661
Ml10-93	Mali	2016	SRR6241776	Modern	7994129	7246270	0.9064	785465	762518	597960	100.337	18.36X	5.23X	0.9753	0.9736	1.3135	10.5229
Ml10-94	Mali	2016	SRR6241777	Modern	7488372	6552543	0.875	5208939	5059755	3225160	100.495	99.17X	18.28X	0.9756	0.9753	1.615	77.2182
Ml10-95	Mali	2016	SRR6241793	Modern	7516764	7295067	0.9705	5711769	5546438	3539793	100.471	108.82X	19.71X	0.9756	0.9754	1.6135	76.03
Ml10-96	Mali	2016	SRR6241792	Modern	6791443	6592806	0.9707	6426429	6241661	3911984	100.5	120.3X	21.63X	0.9756	0.9754	1.6427	94.6738
Ml10-97	Mali	2016	SRR6241791	Modern	7039817	6815749	0.9681	6405428	6218646	3897481	100.48	119.83X	21.43X	0.9756	0.9754	1.6434	91.2394
Ml10-98	Mali	2016	SRR6241790	Modern	4767491	4591793	0.9631	3897764	3785328	2757186	100.498	84.78X	16.17X	0.9756	0.9753	1.4136	82.4368
Ml10-99	Mali	2016	SRR6241789	Modern	6752711	6207080	0.9191	5915232	5743522	3642077	100.489	111.99X	20.35X	0.9757	0.9754	1.6241	92.5318
Ml2-10	Guinea	2016	SRR3330052	Modern	15333638	14617197	0.9532	3375579	3272627	2247892	98.8215	67.97X	14.1X	0.9756	0.9751	1.5016	22.3889
ML2-5	Mali	2012	SRR6241788	Modern	96652770	94568356	0.9784	79441688	75509573	3900136	98.8714	117.99X	32.77X	0.9757	0.9754	20.3689	79.8466
Ml6-50	Guinea	2016	SRR3330053	Modern	3601077	3560788	0.9888	3309948	3198863	2467365	99.2884	74.96X	15.23X	0.9756	0.9752	1.3414	89.8358
Ml6-55	Guinea	2016	SRR3330054	Modern	3592817	3427269	0.9539	3015325	2929535	2284882	99.3902	69.49X	14.63X	0.9755	0.9751	1.3196	85.4772
Ml9-79	Mali	2014	SRR6241787	Modern	6809618	6793777	0.9976	6652201	6459487	3791713	100.404	116.49X	21.37X	0.9756	0.9754	1.7544	95.0795
Ml9-80	Mali	2014	SRR6241775	Modern	4683167	4650987	0.9931	4286974	4166365	1930942	100.427	59.34X	12.2X	0.9756	0.9751	2.2201	89.5802
Ml9-81	Mali	2014	SRR6241774	Modern	4547263	4530879	0.9963	4485775	4357633	3039196	100.268	93.24X	18.56X	0.9756	0.9753	1.4759	96.1763
Ml9-82	Mali	2014	SRR062543	Modern	5455538	5424339	0.9942	4267711	4147555	2916108	100.303	89.5X	17.79X	0.9756	0.9753	1.4634	76.4619
Ml9-83	Mali	2014	SRR020801	Modern	7773158	7734353	0.995	1974392	1917469	1579611	100.396	48.52X	10.4X	0.9755	0.975	1.2499	24.7916
Ml9-84	Mali	2014	SRR062638	Modern	6264778	6234624	0.9951	5658344	5498136	3394088	100.463	104.33X	20.41X	0.9756	0.9753	1.6671	88.1871
Ml9-86	Mali	2014	SRR6241773	Modern	5329192	5310046	0.9964	5209106	5061832	3392921	100.347	104.18X	20.04X	0.9756	0.9753	1.5352	95.3256
Ml9-87	Mali	2014	SRR6241772	Modern	65998109	63961900	0.9691	4532099	4369138	3067186	100.204	94.04X	18.04X	0.9756	0.9753	1.4776	6.83084
Ng12-33	Niger	2015	SRR6241771	Modern	12445851	12389416	0.9954	11734151	11395738	4411594	100.142	135.18X	25.1X	0.9756	0.9754	2.6598	91.9796
Ng13-32	Niger	2015	SRR6241811	Modern	12312687	10985935	0.8922	9962787	9681650	4834250	100.34	148.42X	26.5X	0.9756	0.9754	2.0608	88.1277
Ng13-33	Niger	2015	SRR6241812	Modern	6075127	5826398	0.959	5711583	5549953	3613639	100.187	110.78X	21.77X	0.9756	0.9753	1.5805	95.2553
Ng14-35	Niger	2015	SRR6241813	Modern	38607229	37952849	0.983	486427	470797	435390	97.9964	13.06X	4.32X	0.9752	0.9697	1.1172	1.24048
Ng15-36	Niger	2015	SRR6241814	Modern	10958973	10782218	0.9838	9934319	9651434	2182718	100.058	66.83X	13.75X	0.9755	0.9751	4.5513	89.5125
Ng15-37	Niger	2015	SRR6241815	Modern	24464652	24232008	0.9904	15872824	15416598	5214745	100.456	160.29X	27.85X	0.9757	0.9755	3.0438	63.6208
Ng16-38	Niger	2015	SRR6241775	Modern	11673662	10708209	0.9172	10515435	10169372	4959514	93.1406	141.34X	25.3X	0.9756	0.9754	2.1202	94.968
Ng17-39	Niger	2015	SRR6241774	Modern	14173290	13034568	0.9196	9135175	8829025	4661537	92.4524	131.87X	24.2X	0.9756	0.9753	1.9596	67.7355
NHDP-55	USA	2004	SRR062543	Modern	6925082	5494509	0.7934	4411216	4192878	2929761	30	26.89X	7.52X	0.9702	0.9697	1.5056	76.3103
NHDP-63	USA	2004	SRR020801	Modern	18547735	16616709	0.8958	11966823	10773618	4960446	35.3125	53.6X	11.24X	0.9708	0.9705	2.4124	64.8361
NHDP-98	USA	2004	SRR062638	Modern	7619615	7142611	0.9373	6924231	6533420	3844969	34.5611	40.66X	10.41X	0.9707	0.9703	1.8008	91.471
Oku-4	Japan	2000	SRR6241773	Modern	2715604	5426574	0.9366	994408	913140	874744	211.799	32.88X	34.28X	0.9367	0.8209	1.1367	16.8272
Pak	Pakistan	2010	SRR6241772	Modern	36427193	35344771	0.9702	4330629	4146406	2380991	95.3585	69.47X	24.91X	0.9755	0.9735	1.8188	11.7313
Ryukyu-2	Japan	2000	SRR6241771	Modern	1755102	3492876	0.9875	2898636	2751043	2740160	166.066	37.14X	15.27X	0.983	0.9771	1.0578	78.7615
S10-Ch-04	China	2006	SRR847083	Modern	45298082	42256505	0.9328	6277242	5452316	777120	64.7219	15.39X	5.56X	0.9744	0.9687	8.0775	12.9029
S11-Inde-2	India	2000	SRR847084	Modern	51031423	47880999	0.9382	34623219	31002131	6027508	94.0136	173.39X	33.25X	0.9757	0.9754	5.7442	64.7483
S13-Ml-3-28	Mali	2013	SRR847086	Modern	9475478	8963565	0.9459	1082109	892342	602884	77.6016	14.32X	5.73X	0.9751	0.9605	1.7948	9.95521
S14-Ml-2-07	Mali	2013	SRR847087	Modern	37223962	34843516	0.936	1987732	1278479	829236	65.8128	16.69X	9.75X	0.9736	0.9267	2.397	3.6692
S15-92041	Martinique	1992	SRR847060	Modern	1782723	3526576	0.9804	1908862	1661661	618794	116.238	10.49X	5.37X	0.9727	0.8808	3.0848	47.1183
S2-95034	Antilles	1995	SRR847077	Modern	5853033	5515701	0.9423	664828	583884	412381	83.3279	10.51X	4.56X	0.9743	0.9205	1.6121	10.5859
S9-96008	New_Caledonia	1996	SRR847062	Modern	3768770	7178940	0.9502	2169624	1915195	707012	130.448	19.45X	8.55X	0.9766	0.9624	3.0687	26.678
SM1	West Africa	1979	SRR5832640	Modern	697450	697443	0.9999	440540	427091	372730	242.306	27.62X	7.89X	0.9888	0.9829	1.1819	61.2367
Thai-237	Thailand	2000	SRR6241770	Modern	2102461	4186262	0.995562	1471408	1382652	1302036	206.083	47.29X	35.46X	0.9756	0.9439	1.13	33.0283
Thai-311	Thailand	2000	SRR6241769	Modern	1321912	2642972	0.7947	1730202	1220331	1191445	221.608	64.31X	21.25X	0.9843	0.9813	1.4521	46.1727
Thai-53	Thailand	2005	SRR020800	Modern	11973675	11286312	0.9425	4729864	4190300	2947720	35.59	32.1X	8.37X	0.9708	0.9703	1.6045	37.1273
Tsukuba-1	Japan	2000	SRR6241768	Modern	1349334	2696200	0.589	2042214	1606673	1594799	230.434	92.22X	34.32X	0.984	0.982	1.2805	59.5903
US57	Marshall_Islands	2000	SRR6241767	Modern	29759281	29611800	0.995	726780	705162	646899	99.0284	19.6X	6.44X	0.9752	0.9715	1.1234	2.38135
Ye2-3	Yemen	2014	SRR6241766	Modern	5111439	4992001	0.9766	863771	824265	458145	97.553	13.68X	7.85X	0.9727	0.9138	1.8853	16.5117
Ye4-10	Yemen	2015	SRR6241751	Modern	4624018	9245628	0.9732	7284652	3985395	3940983	270.368	285.53X	111.45X	0.9877	0.9866	1.8484	43.1057
Ye4-11	Yemen	2015	SRR6241752	Modern	4931260	9859226	0.9603	8111996	4044947	3973368	261.614	270.6X	111.81X	0.9878	0.9865	2.0415	41.027
Ye4-12	Yemen	2015	SRR6241753	Modern	1660936	3321308	0.9749	1504190	1019649	977464	269.836	64.89X	37.16X	0.9864	0.9835	1.5388	30.7002
Ye4-8	Yemen	2015	SRR6241754	Modern	5980184	11956026	0.9687	9852448	5437857	5325775	245.576	308.95X	160.17X	0.9876	0.9865	1.8499	45.4821
Zensho-2	Japan	2000	SRR6241755	Modern	1108615	2214220	0.7009	1633002	1186000	1164866	236.418	73.82X	23.55X	0.9841	0.9814	1.4018	53.5629
Zensho-4	Japan	2000	SRR6241756	Modern	1219189	2435836	0.6109	1132452	634140	619978	230.012	36.04X	12.82X	0.9832	0.9782	1.8266	26.0338
Zensho-5	Japan	2000	SRR6241757	Modern	1736263	3471735	0.4941	1250668	747435	720792	247.879	53.11X	22.45X	0.9834	0.9779	1.7351	21.5291
Zensho-9	Japan	2000	SRR6241758	Modern	1879971	3758564	0.5826	953440	629023	612811	248.578	45.55X	19.18X	0.983	0.977	1.5558	16.7357
511	Samoa	2011	SRR10987708 SRR10987709	Modern but treated as ancient	29838426	22613740	0.7578	1969134	1582610	576690	55.5724	9.8061X	6.5775X	0.9603	0.7667	3.4145	6.99844
515	Hawai'i	2011	SRR10987697 SRR10987695	Modern but treated as ancient	11554119	10337498	0.8947	1546756	1222544	635824	51.7345	10.0652X	7.9161X	0.9546	0.7253	2.4326	11.8263
516	Samoa	2014	SRR10987693	Modern but treated as ancient	19027808	17951574	0.9434	11525013	9404261	635186	67.1703	13.0549X	5.6965X	0.9755	0.9372	18.1443	52.3868
517	Guam	2014	SRR10987691	Modern but treated as ancient	25778232	25209482	0.9779	23520201	19250020	1574103	65.208	31.4071X	11.4785X	0.9766	0.973	14.9419	76.3602
518	Hawai'i	2011	SRR10987690	Modern but treated as ancient	24644557	23591015	0.9572	18982550	15455976	2899280	71.2389	63.1978X	25.971X	0.9781	0.9754	6.5473	65.5164
519	Hawai'i	2014	SRR10987688 SRR10987689	Modern but treated as ancient	27093473	24986970	0.9222	10684389	8625916	545816	61.8691	10.333X	5.3048X	0.9727	0.8726	19.575	34.5217
520	Hawai'i	2015	SRR10987687	Modern but treated as ancient	18253543	17829924	0.9767	16765106	13362334	1616046	66.2214	32.7452X	13.8095X	0.977	0.9698	10.3741	74.9433
536	Guam	2012	SRR10987705	Modern but treated as ancient	3929368	3135862	0.798	625284	498026	374295	52.9083	6.0597X	5.2423X	0.9148	0.5203	1.6705	15.8816
537	Northern Mariana Islands	1998	SRR10987704	Modern but treated as ancient	5625078	4895908	0.8703	21774	14429	6308	44.3549	0.0856X	0.3116X	0.0807	0	3.4518	0.294716
538	Samoa	2000	SRR10987703	Modern but treated as ancient	2491655	1268995	0.5092	139186	93920	1365	37.819	0.0158X	0.1312X	0.0153	0	101.968	7.40113
539	Northern Mariana Islands	2008	SRR10987702	Modern but treated as ancient	4949898	3237828	0.6541	202764	163697	20388	56.9631	0.3554X	0.6074X	0.2951	0.0001	9.9452	5.05577
540	Northern Mariana Islands	1998	SRR10987701	Modern but treated as ancient	4917134	3841845	0.7813	48934	34127	4691	53.8069	0.0772X	0.2963X	0.073	0.0001	10.4314	0.888297
542	Palau	2000	SRR10987700	Modern but treated as ancient	3207330	2122942	0.6619	121111	94115	1589	52.6665	0.0256X	0.1689X	0.0246	0	76.2183	4.43323
543	Palau	2002	SRR10987699	Modern but treated as ancient	3194771	1979888	0.6197	25763	16614	1889	48.9402	0.0283X	0.185X	0.0271	0.0001	13.6384	0.839138
523A1	Hawai'i	2008	SRR10987706 SRR10987707	Modern but treated as ancient	31404251	25236254	0.8035	3843126	3140740	242303	58.1892	4.3142X	2.6888X	0.9427	0.4332	15.8608	12.4453
Blevins et al., Evolutionary history of Mycobacterium leprae in the Pacific Islands
